# Supplementary material for: Increasing Organ Donor Registration in a Primary Care Clinic
Source: PubMed Central journal article supplement — BMJ Qual Improv Rep. 2017 Apr 28;6(1):u222401.w8341. doi: 10.1136/bmjquality.u222401.w8341 (PMC5411726; doi:10.1136/bmjquality.u222401.w8341), 2017-04-28
Supplement: bmjqir.u222401.w8341supp_appendices.pdf [file bmjqir.u222401.w8341supp_appendices.pdf]

**Appendix 1.**

**Cause-and-Effect Diagram showing identification and analysis of modifiable factors influencing organ donation**

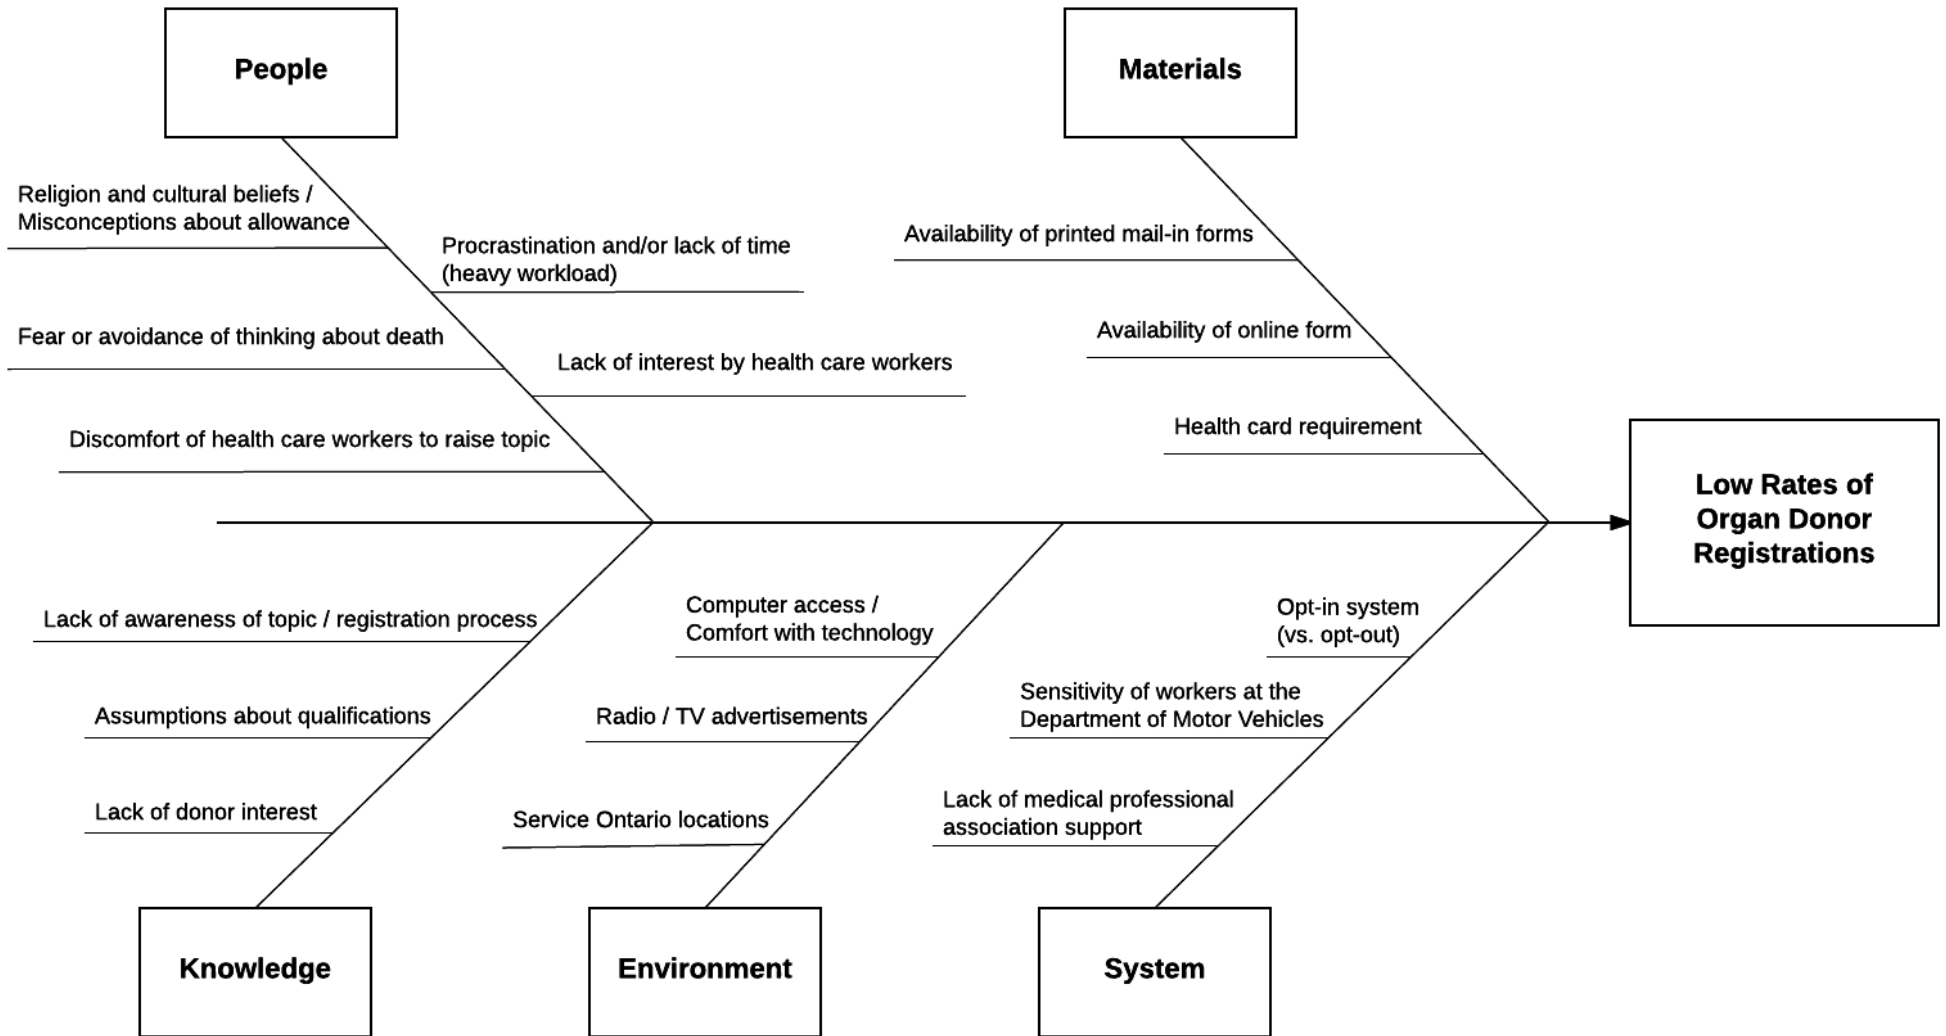

## **Appendix 2.**

### **List of questions patients were asked during PDSA Cycle 1**

1. On a scale of 1-10, how clear did you find the handout?
2. Is there anything on the handout that you didn't understand?
3. Are you currently an organ donor?
  - a. If yes, did this reinforce your decision to be a donor?
  - b. If no, does this affect your decision at all to become a donor?
4. Was there anything on her handout that made you feel uncomfortable?
5. Is there any additional information that you would want that we were missing?

## WHAT is organ donation?

- ✓ Organ donation occurs **after death** and is the process of giving away one's organs and/or tissues to someone in need
- ✓ Organ transplantation is an **effective treatment option** for people with organ failure
- ✓ **28%** of Ontarians are registered organ donors
- ✓ Your donation will help those with the **greatest need** and **potential to benefit** from a transplant
- ✓ You can donate all organs or **omit specific organs** you wish not to donate

## WHY register?

- ✓ Currently, **over 1600 people** in Ontario are waiting for a life-saving organ transplant
- ✓ **Every 3 days** someone in Ontario dies waiting for a life-saving transplant

**1 ORGAN DONOR  
CAN SAVE 8 LIVES.**

IT ONLY TAKES 2 MINUTES FOR YOU TO REGISTER.

## WHO can register?

- ✓ Anyone **aged 16 and over** can register, regardless of their health status
- ✓ You **cannot** be too old or too sick to register as a donor (pre-transplant assessments will be conducted)
- ✓ You can **change or withdraw** your donor consent at any time

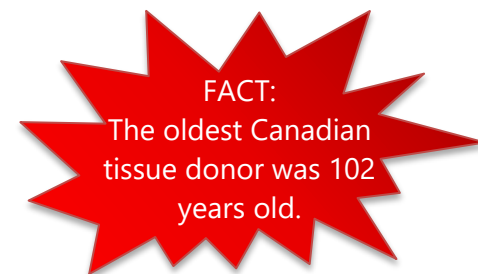

## HOW do you register?

**3 ways** to register, check, or edit your registration status:

- 1) **Online** at **beadonor.ca**, or
- 2) **In person** at any ServiceOntario centre, or
- 3) By **mailing** the Gift of Life consent form (attached and/or available in Dr. Bordman's office)

## Questions?

**For more information, contact:**

1-800-263-2833 (Toll Free) or  
416-363-4001 (Toronto)

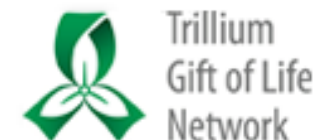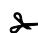

*Dr. Bordman would like to record the following information in your chart:*

Are you **currently registered** as an organ donor?

- Yes     No     Unsure     Prefer not to answer

Would you like to learn more about organ donation?

- Yes     No

Name: \_\_\_\_\_ Date of Birth: \_\_\_\_\_

Phone Number: \_\_\_\_\_ - \_\_\_\_\_ - \_\_\_\_\_

Can we contact you regarding your registration status?

- Yes     No

*Please take your time to think about registering.*

*We would be happy to mail the attached registration form for you.*

## WHAT is organ donation?

- ✓ Organ donation occurs **after death** and is the process of giving away one's organs and/or tissues to someone in need
- ✓ Organ transplantation is an **effective treatment option** for people with organ failure
- ✓ **28%** of Ontarians are registered organ donors
- ✓ Your donation will help those with the **greatest need** and **potential to benefit** from a transplant
- ✓ You can donate all organs or **omit specific organs** you wish not to donate

## WHY register?

- ✓ Currently, **over 1600 people** in Ontario are waiting for a life-saving organ transplant
- ✓ **Every 3 days** someone in Ontario dies waiting for a life-saving transplant

**1 ORGAN DONOR  
CAN SAVE 8 LIVES.**

IT ONLY TAKES 2 MINUTES FOR YOU TO REGISTER.

## WHO can register?

- ✓ Anyone **aged 16 and over** can register, regardless of their health status
- ✓ You **cannot** be too old or too sick to register as a donor (pre-transplant assessments will be conducted)
- ✓ You can **change or withdraw** your donor consent at any time

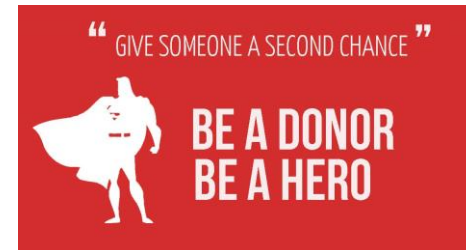

## HOW do you register?

**3 ways** to register, check, or edit your registration status:

- 1) **Online** at **beadonor.ca**, or
- 2) **In person** at any ServiceOntario centre, or
- 3) By **mailing** the Gift of Life consent form (attached and/or available in Dr. Bordman's office)

## Questions?

**For more information, contact:**

1-800-263-2833 (Toll Free) or  
416-363-4001 (Toronto)

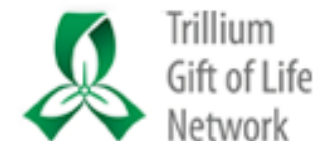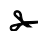

*Dr. Bordman would like to record the following information in your chart:*

Are you **currently registered** as an organ donor?

- Yes     No     Unsure     Prefer not to answer

Would you like to learn more about organ donation?

- Yes     No

Name: \_\_\_\_\_ Date of Birth: \_\_\_\_\_

Phone Number: \_\_\_\_\_ - \_\_\_\_\_ - \_\_\_\_\_

Can we contact you regarding your registration status?

- Yes     No

*Please take your time to think about registering.*

*We would be happy to mail the attached registration form for you.*
